# Supplementary material
Source: Elsevier journal article supplement (https://comptes-rendus.academie-sciences.fr/geoscience/article/10.1016/j.crte.2015.04.002/file/attach/mmc1.pdf)
Supplement: mmc1 [file mmc1.pdf]

**Table 1: Surface water and groundwater sample locations, field parameters, select anion concentrations, electroneutrality and stable isotope abundance ratios. Values for each parameter are the average value of three sampling campaigns. 'SD' = Standard Deviation. A '-' average value indicates a value was not obtained during any of the sampling campaigns. A '-' SD value indicates one value, or no value was determined during the three sampling campaigns. DO = Dissolved Oxygen. CB = Charge Balance.**

| Section                      | ID | Location |           | Field Parameters |                 |                    |                | Anions and Electroneutrality      |                                    |             |                                                  | Stable Isotope Abundance Ratios (‰)             |                                                  |                                                  |                                                  |                                                  |  |  |  |  |  |
|------------------------------|----|----------|-----------|------------------|-----------------|--------------------|----------------|-----------------------------------|------------------------------------|-------------|--------------------------------------------------|-------------------------------------------------|--------------------------------------------------|--------------------------------------------------|--------------------------------------------------|--------------------------------------------------|--|--|--|--|--|
|                              |    | N        | W         | pH ± SD          | Temp. (°C) ± SD | Cond. (µS/cm) ± SD | DO (mg/L) ± SD | NO <sub>3</sub> <sup>-</sup> ± SD | SO <sub>4</sub> <sup>2-</sup> ± SD | CB (%) ± SD | δ <sup>18</sup> O <sub>H<sub>2</sub>O</sub> ± SD | δ <sup>2</sup> H <sub>H<sub>2</sub>O</sub> ± SD | δ <sup>15</sup> N <sub>NO<sub>3</sub></sub> ± SD | δ <sup>18</sup> O <sub>NO<sub>3</sub></sub> ± SD | δ <sup>34</sup> S <sub>SO<sub>4</sub></sub> ± SD | δ <sup>18</sup> O <sub>SO<sub>4</sub></sub> ± SD |  |  |  |  |  |
| <b>Surface Water Samples</b> |    |          |           |                  |                 |                    |                |                                   |                                    |             |                                                  |                                                 |                                                  |                                                  |                                                  |                                                  |  |  |  |  |  |
| Below the Confluence         | 1  | 49.000°  | -118.767° | 7.81 0.13        | 5.7 1.7         | 99 64              | 11.8 0.9       | 0.043 -                           | 4.6 3.6                            | 6.3 4.2     | -16.9 0.4                                        | -129 2                                          | 3.0 -                                            | 8.1 -                                            | 0.9 0.7                                          | 0.8 2.1                                          |  |  |  |  |  |
|                              | 2  | 49.004°  | -118.776° | 7.93 0.16        | 4.7 2.0         | 120 53             | 12.1 0.9       | 0.888 1.146                       | 5.7 3.1                            | 3.2 10.0    | -16.8 0.4                                        | -128 2                                          | 6.8 -                                            | 5.7 -                                            | 0.7 1.3                                          | 1.5 3.1                                          |  |  |  |  |  |
|                              | 3  | 49.008°  | -118.833° | 7.94 0.40        | 6.1 2.7         | 96 66              | 12.6 1.9       | 0.075 -                           | 4.6 4.4                            | 4.5 2.3     | -16.9 0.6                                        | -128 3                                          | - -                                              | - -                                              | 0.9 0.8                                          | 1.0 2.0                                          |  |  |  |  |  |
|                              | 4  | 49.027°  | -118.867° | 7.90 0.18        | 5.2 2.2         | 96 54              | 12.5 2.0       | 0.097 -                           | 4.3 3.3                            | 6.0 1.6     | -17.0 0.5                                        | -129 3                                          | 4.4 -                                            | 3.0 -                                            | 0.6 1.0                                          | 2.6 3.9                                          |  |  |  |  |  |
|                              | 5  | 49.043°  | -118.877° | 7.83 0.24        | 3.7 2.8         | 110 51             | 12.5 1.1       | 0.115 -                           | 5.0 2.7                            | 1.6 5.2     | -16.9 0.4                                        | -128 2                                          | 3.5 -                                            | 2.3 -                                            | 0.2 1.7                                          | 1.7 4.1                                          |  |  |  |  |  |
|                              | 6  | 49.057°  | -118.944° | 8.05 0.31        | 5.0 2.2         | 108 50             | 12.3 1.0       | 0.075 0.017                       | 4.7 2.7                            | 2.4 9.5     | -17.0 0.5                                        | -128 2                                          | 6.9 -                                            | 3.2 -                                            | 0.9 0.4                                          | 3.0 4.2                                          |  |  |  |  |  |
|                              | 7  | 49.060°  | -119.002° | 7.93 0.30        | 5.1 2.2         | 107 41             | 12.3 0.9       | 0.019 0.011                       | 4.4 2.4                            | 4.6 6.1     | -16.9 0.4                                        | -128 2                                          | - -                                              | - -                                              | 0.9 0.4                                          | 3.2 4.4                                          |  |  |  |  |  |
|                              | 8  | 49.110°  | -118.979° | 7.82 0.26        | 4.6 1.7         | 100 50             | 12.3 0.7       | 0.037 0.019                       | 4.4 2.4                            | 3.7 6.9     | -17.0 0.4                                        | -129 2                                          | 3.8 -                                            | -0.6 -                                           | 0.8 0.5                                          | 1.6 3.4                                          |  |  |  |  |  |
| Kettle River                 | 9  | 49.230°  | -118.928° | 7.62 0.24        | 4.5 1.8         | 85 42              | 12.0 0.6       | 0.157 0.182                       | 3.6 1.8                            | 3.4 6.2     | -17.0 0.4                                        | -129 2                                          | - -                                              | - -                                              | 0.5 1.2                                          | 0.8 2.3                                          |  |  |  |  |  |
|                              | 10 | 49.382°  | -118.876° | 7.46 0.14        | 2.5 3.0         | 79 37              | 12.5 1.0       | - -                               | 3.3 1.6                            | 1.0 6.5     | -17.3 0.3                                        | -130 2                                          | - -                                              | - -                                              | 0.6 0.6                                          | -1.2 0.9                                         |  |  |  |  |  |
|                              | 11 | 49.500°  | -118.825° | 7.63 0.13        | 2.7 2.6         | 72 36              | 12.3 0.9       | 0.051 -                           | 3.0 1.5                            | 0.1 9.4     | -17.3 0.4                                        | -130 1                                          | - -                                              | - -                                              | 0.2 0.6                                          | -0.3 0.5                                         |  |  |  |  |  |
|                              | 12 | 49.564°  | -118.795° | 7.64 0.10        | 2.1 2.8         | 69 32              | 12.6 1.1       | 0.138 -                           | 2.5 1.1                            | 1.9 5.3     | -17.3 0.3                                        | -131 2                                          | - -                                              | - -                                              | -0.4 0.0                                         | -1.5 2.7                                         |  |  |  |  |  |
|                              | 13 | 49.632°  | -118.775° | 7.73 0.12        | 1.9 3.0         | 74 34              | 12.7 1.1       | 0.022 -                           | 2.6 1.0                            | 4.0 6.3     | -17.3 0.3                                        | -131 2                                          | - -                                              | - -                                              | -2.3 1.5                                         | -2.6 1.5                                         |  |  |  |  |  |
|                              | 14 | 49.797°  | -118.714° | 7.76 0.14        | 2.3 2.9         | 88 35              | 12.3 1.1       | - -                               | 3.0 1.0                            | 1.8 3.9     | -17.3 0.5                                        | -131 2                                          | - -                                              | - -                                              | -2.4 0.7                                         | -2.6 1.0                                         |  |  |  |  |  |
|                              | 15 | 49.953°  | -118.679° | 7.77 0.14        | 1.9 2.9         | 73 46              | 12.4 0.9       | 0.087 -                           | 2.9 1.2                            | 3.1 5.8     | -17.4 0.5                                        | -132 4                                          | - -                                              | - -                                              | 1.8 0.2                                          | -4.2 1.2                                         |  |  |  |  |  |
|                              | 16 | 50.059°  | -118.508° | 8.04 0.14        | 3.2 3.0         | 152 34             | 11.7 0.9       | 0.084 -                           | 5.8 0.7                            | -0.1 2.6    | -17.4 0.3                                        | -132 3                                          | - -                                              | - -                                              | -9.4 0.6                                         | -2.7 0.2                                         |  |  |  |  |  |
|                              | 17 | 50.130°  | -118.363° | 7.93 0.07        | 4.9 4.7         | 84 6               | 11.1 0.3       | 0.016 -                           | 4.6 0.3                            | 1.0 6.1     | -16.9 0.7                                        | -131 5                                          | - -                                              | - -                                              | -11.9 0.2                                        | -3.0 0.7                                         |  |  |  |  |  |
| West Kettle River            | 18 | 49.170°  | -118.975° | 7.55 0.64        | 4.3 2.2         | 123 68             | 12.4 1.2       | 0.407 -                           | 5.7 3.6                            | 1.0 5.2     | -16.6 0.3                                        | -127 1                                          | - -                                              | - -                                              | 1.3 0.6                                          | 1.8 1.2                                          |  |  |  |  |  |
|                              | 19 | 49.205°  | -119.008° | 7.54 0.33        | 2.8 5.5         | 134 80             | 12.8 2.1       | 0.033 -                           | 5.7 3.5                            | 2.5 7.3     | -16.6 0.3                                        | -127 1                                          | - -                                              | - -                                              | 1.0 0.1                                          | 2.9 4.0                                          |  |  |  |  |  |
|                              | 20 | 49.256°  | -119.011° | 7.80 0.08        | 3.8 4.1         | 128 76             | 12.3 1.3       | - -                               | 5.8 3.5                            | 4.8 5.7     | -16.8 0.2                                        | -128 0                                          | - -                                              | - -                                              | 1.7 0.8                                          | -1.2 0.8                                         |  |  |  |  |  |
|                              | 21 | 49.378°  | -119.097° | 7.69 0.16        | 2.4 3.2         | 123 68             | 12.4 1.6       | 0.076 0.046                       | 5.5 3.4                            | 4.2 5.8     | -16.8 0.4                                        | -128 2                                          | 7.2 -                                            | 0.7 -                                            | 0.2 0.3                                          | 0.0 1.6                                          |  |  |  |  |  |
|                              | 22 | 49.435°  | -119.092° | 7.70 0.18        | 1.0 4.2         | 84 44              | 12.9 1.9       | 0.086 -                           | 3.0 1.8                            | 4.3 9.3     | -16.8 0.5                                        | -128 3                                          | - -                                              | - -                                              | 1.7 0.2                                          | -0.1 3.3                                         |  |  |  |  |  |
|                              | 23 | 49.789°  | -119.036° | 7.67 0.14        | 1.4 5.2         | 77 43              | 13.1 1.9       | 0.031 0.010                       | 2.7 1.5                            | 2.2 7.9     | -16.6 0.1                                        | -127 1                                          | - -                                              | - -                                              | 2.1 -                                            | -1.9 -                                           |  |  |  |  |  |
|                              | 24 | 49.564°  | -119.055° | 7.71 0.24        | 0.4 4.2         | 58 32              | 13.2 1.5       | 0.022 -                           | 1.4 0.6                            | 5.8 11.2    | -16.9 0.4                                        | -128 3                                          | - -                                              | - -                                              | 2.5 -                                            | -1.5 -                                           |  |  |  |  |  |
|                              | 25 | 49.495°  | -119.122° | 7.94 0.40        | 0.0 3.9         | 35 25              | 14.5 3.9       | - -                               | 1.2 0.4                            | 3.5 5.1     | -16.9 0.3                                        | -128 4                                          | - -                                              | - -                                              | 2.3 -                                            | -0.8 -                                           |  |  |  |  |  |
| <b>Groundwater Samples</b>   |    |          |           |                  |                 |                    |                |                                   |                                    |             |                                                  |                                                 |                                                  |                                                  |                                                  |                                                  |  |  |  |  |  |
| Below the Confluence         | 26 | 49.002°  | -118.765° | 7.36 0.05        | 7.3 0.7         | 488 49             | 5.3 2.8        | 18.600 22.110                     | 38.3 1.2                           | -2.3 1.7    | -17.0 0.0                                        | -131 2                                          | 5.9 0.7                                          | -4.4 2.3                                         | 1.2 0.0                                          | -5.1 0.5                                         |  |  |  |  |  |
|                              | 27 | 49.011°  | -118.845° | 7.28 0.10        | 6.4 0.7         | 262 28             | 1.9 1.4        | 15.878 20.573                     | 17.1 0.1                           | -1.4 5.1    | -17.1 0.3                                        | -130 0                                          | 14.3 0.5                                         | 1.6 0.5                                          | 0.7 0.2                                          | -4.2 0.2                                         |  |  |  |  |  |
|                              | 28 | 49.028°  | -118.866° | 7.31 0.00        | 8.0 0.7         | 351 33             | 4.3 4.2        | 33.525 -                          | 16.9 0.3                           | -2.1 5.8    | -16.7 0.0                                        | -127 0                                          | 12.8 0.1                                         | 3.2 0.1                                          | -0.3 1.1                                         | -1.1 1.6                                         |  |  |  |  |  |
|                              | 29 | 49.035°  | -118.863° | 8.47 0.04        | 9.1 0.8         | 675 76             | 1.3 0.2        | - -                               | 111.7 0.7                          | 1.3 5.3     | -17.9 0.2                                        | -142 0                                          | - -                                              | - -                                              | -3.2 0.3                                         | -5.7 0.3                                         |  |  |  |  |  |
|                              | 30 | 49.047°  | -118.896° | 7.54 0.13        | 5.2 0.3         | 356 28             | 5.6 1.8        | 15.932 11.227                     | 15.9 0.4                           | -0.5 1.4    | -17.4 0.2                                        | -131 1                                          | 5.4 0.3                                          | -3.9 0.3                                         | 0.7 0.3                                          | -3.7 1.3                                         |  |  |  |  |  |
|                              | 31 | 49.061°  | -118.905° | 7.39 0.10        | 8.8 1.6         | 625 98             | 9.4 0.3        | 0.060 -                           | 39.6 0.7                           | 0.2 1.9     | -16.5 0.2                                        | -128 1                                          | 4.5 -                                            | -4.8 -                                           | 3.5 0.4                                          | -1.9 0.3                                         |  |  |  |  |  |
|                              | 32 | 49.055°  | -118.949° | 8.07 0.01        | 5.8 0.6         | 311 6              | 5.5 2.3        | 16.803 14.817                     | 14.9 0.1                           | -1.1 4.9    | -17.1 0.2                                        | -130 0                                          | 2.8 0.5                                          | -4.8 0.6                                         | 0.6 0.2                                          | -6.0 1.2                                         |  |  |  |  |  |
|                              | 33 | 49.050°  | -118.965° | 7.73 -           | 7.3 -           | 374 -              | 6.5 -          | 3.483 -                           | 15.2 -                             | 2.2 -       | -17.3 -                                          | -131 -                                          | 7.4 -                                            | -7.0 -                                           | 0.8 -                                            | -4.9 -                                           |  |  |  |  |  |
|                              | 34 | 49.052°  | -118.957° | 7.91 0.01        | 8.1 1.7         | 294 1              | 4.4 1.7        | 21.649 27.819                     | 10.7 0.3                           | -0.6 2.7    | -17.0 0.2                                        | -130 1                                          | 6.5 -                                            | -5.2 -                                           | 0.9 0.1                                          | -5.5 0.3                                         |  |  |  |  |  |
|                              | 35 | 49.048°  | -118.975° | 8.12 0.31        | 9.4 0.9         | 706 168            | 5.5 0.7        | 6.406 -                           | 142.5 4.3                          | 1.5 1.3     | -18.1 0.3                                        | -140 1                                          | 9.7 6.5                                          | -8.1 0.7                                         | 1.7 1.0                                          | -3.2 0.9                                         |  |  |  |  |  |
|                              | 36 | 49.056°  | -118.998° | 7.13 0.06        | 5.1 0.4         | 233 3              | 6.4 2.1        | 23.826 -                          | 15.7 1.9                           | 0.0 7.9     | -16.6 0.4                                        | -124 0                                          | 4.8 1.7                                          | -6.4 0.3                                         | 1.2 0.4                                          | -3.2 0.8                                         |  |  |  |  |  |

Table 1 continued

| Section                    | ID | Location |            | Field Parameters |                 |                    |                | Anions and Electroneutrality      |                                    |             |                                                  | Stable Isotope Abundance Ratios (‰)             |                                                  |                                                  |                                                  |                                                  |  |  |  |  |  |  |  |
|----------------------------|----|----------|------------|------------------|-----------------|--------------------|----------------|-----------------------------------|------------------------------------|-------------|--------------------------------------------------|-------------------------------------------------|--------------------------------------------------|--------------------------------------------------|--------------------------------------------------|--------------------------------------------------|--|--|--|--|--|--|--|
|                            |    | N        | W          | pH ± SD          | Temp. (°C) ± SD | Cond. (µS/cm) ± SD | DO (mg/L) ± SD | NO <sub>3</sub> <sup>-</sup> ± SD | SO <sub>4</sub> <sup>2-</sup> ± SD | CB (%) ± SD | δ <sup>18</sup> O <sub>H<sub>2</sub>O</sub> ± SD | δ <sup>2</sup> H <sub>H<sub>2</sub>O</sub> ± SD | δ <sup>15</sup> N <sub>NO<sub>3</sub></sub> ± SD | δ <sup>18</sup> O <sub>NO<sub>3</sub></sub> ± SD | δ <sup>34</sup> S <sub>SO<sub>4</sub></sub> ± SD | δ <sup>18</sup> O <sub>SO<sub>4</sub></sub> ± SD |  |  |  |  |  |  |  |
| <b>Groundwater Samples</b> |    |          |            |                  |                 |                    |                |                                   |                                    |             |                                                  |                                                 |                                                  |                                                  |                                                  |                                                  |  |  |  |  |  |  |  |
| Below the Confluence       | 37 | 49.058 ° | -119.000 ° | 7.50 0.04        | 6.7 0.3         | 625 46             | 8.5 0.7        | 24.437 8.719                      | 23.7 1.6                           | 5.0 6.3     | -17.2 0.1                                        | -130 1                                          | 9.8 0.1                                          | -5.7 0.2                                         | 1.6 0.1                                          | -4.5 1.6                                         |  |  |  |  |  |  |  |
|                            | 38 | 49.086 ° | -119.001 ° | 7.50 0.07        | 8.2 0.2         | 434 49             | 3.4 1.3        | 35.651 -                          | 32.2 1.4                           | -2.6 3.5    | -17.1 0.1                                        | -131 0                                          | 6.2 0.8                                          | -4.6 1.3                                         | -0.4 0.2                                         | -6.2 0.7                                         |  |  |  |  |  |  |  |
|                            | 39 | 49.120 ° | -118.998 ° | 7.53 0.28        | 6.6 1.1         | 458 21             | 9.6 2.3        | 18.343 10.134                     | 19.0 0.4                           | 0.7 2.3     | -15.9 0.3                                        | -123 0                                          | 4.1 0.3                                          | -3.3 0.4                                         | 2.9 0.2                                          | -0.9 0.7                                         |  |  |  |  |  |  |  |
|                            | 40 | 49.150 ° | -118.983 ° | 7.36 0.08        | 7.0 0.2         | 325 20             | 8.3 2.4        | 22.141 11.716                     | 8.6 0.6                            | -1.2 3.2    | -16.9 0.3                                        | -128 0                                          | 6.7 0.7                                          | -5.5 1.1                                         | 1.9 0.1                                          | -4.1 0.3                                         |  |  |  |  |  |  |  |
| Kettle River               | 41 | 49.175 ° | -118.972 ° | 7.47 0.02        | 6.5 0.7         | 560 43             | 5.5 0.7        | - -                               | 4.5 0.2                            | -0.6 0.4    | -16.4 0.0                                        | -127 1                                          | 6.4 0.6                                          | -3.3 0.0                                         | 3.4 0.9                                          | -3.9 2.1                                         |  |  |  |  |  |  |  |
|                            | 42 | 49.313 ° | -118.882 ° | 6.83 0.04        | 4.6 0.9         | 191 13             | 5.8 3.2        | 14.248 12.982                     | 6.3 0.2                            | -5.2 2.7    | -16.0 0.0                                        | -123 1                                          | 4.1 -                                            | -2.1 -                                           | 1.6 0.3                                          | -3.8 0.9                                         |  |  |  |  |  |  |  |
|                            | 43 | 49.333 ° | -118.876 ° | 7.07 0.16        | 5.1 1.8         | 198 46             | 10.6 1.1       | 0.329 -                           | 9.4 0.5                            | 1.9 3.8     | -16.2 0.1                                        | -124 1                                          | 3.0 -                                            | -6.3 -                                           | -2.7 0.5                                         | -5.9 1.0                                         |  |  |  |  |  |  |  |
|                            | 44 | 49.364 ° | -118.874 ° | 6.80 0.00        | 7.3 1.9         | 224 13             | 5.4 3.1        | 19.222 26.679                     | 8.7 0.4                            | -6.6 8.8    | -16.9 0.0                                        | -128 1                                          | 3.6 0.6                                          | -6.5 0.3                                         | 1.8 0.2                                          | -6.4 0.4                                         |  |  |  |  |  |  |  |
| West Kettle River          | 45 | 49.257 ° | -119.010 ° | 7.08 0.35        | 7.6 0.9         | 257 91             | 8.4 3.1        | 18.564 17.213                     | 10.6 3.8                           | -2.0 9.1    | -16.4 0.1                                        | -125 0                                          | 15.5 4.7                                         | 2.0 4.9                                          | 1.1 0.8                                          | -2.8 0.1                                         |  |  |  |  |  |  |  |
|                            | 46 | 49.271 ° | -119.021 ° | 7.69 0.03        | 8.2 2.1         | 296 12             | 3.1 1.6        | - -                               | 35.1 5.8                           | -0.2 1.4    | -17.3 0.3                                        | -132 1                                          | 4.7 -                                            | -2.5 -                                           | 7.3 0.9                                          | -2.0 1.7                                         |  |  |  |  |  |  |  |
|                            | 47 | 49.408 ° | -119.105 ° | 7.14 0.00        | 5.5 1.3         | 386 83             | 4.0 2.3        | 17.178 15.477                     | 24.3 0.8                           | -1.1 0.4    | -17.2 0.3                                        | -131 1                                          | 8.7 -                                            | -1.5 -                                           | -0.8 0.4                                         | -6.3 0.2                                         |  |  |  |  |  |  |  |
|                            | 48 | 49.411 ° | -119.105 ° | 6.97 0.11        | 5.0 0.1         | 362 57             | 7.1 1.6        | 15.117 2.748                      | 24.8 0.3                           | -1.7 2.0    | -17.1 0.3                                        | -130 0                                          | 5.5 0.3                                          | -4.0 2.3                                         | 0.4 0.0                                          | -6.9 1.0                                         |  |  |  |  |  |  |  |
|                            | 49 | 49.412 ° | -119.104 ° | 7.07 0.15        | 5.8 1.0         | 357 67             | 8.5 0.1        | 12.842 12.129                     | 24.8 0.2                           | 1.6 0.9     | -17.0 0.0                                        | -130 0                                          | 5.7 -                                            | -3.6 -                                           | 0.2 0.1                                          | -6.9 0.7                                         |  |  |  |  |  |  |  |
